Motion selectivity in MT after V1 lesions

# Altered sensitivity to motion of area MT neurons following long-term V1 lesions

Maureen A. Hagan<sup>1-3</sup>, Tristan A. Chaplin<sup>1-3</sup>, Krystal R. Huxlin<sup>4</sup>, Marcello G. P. Rosa<sup>1-3</sup>, Leo L. Lui<sup>1-3</sup>

<sup>1</sup> Department of Physiology, Monash University, Clayton, VIC 3800, Australia

<sup>2</sup> Neuroscience Program, Biomedicine Research Institute, Monash University, Clayton, VIC 3800, Australia

<sup>3</sup> Australian Research Council, Centre of Excellence for Integrative Brain Function, Monash University Node, Clayton, VIC 3800, Australia

<sup>4</sup> Flaum Eye Institute, University of Rochester, Rochester, NY 14642, USA

**Abbreviated title:** Motion selectivity in MT after V1 lesions

**Correspondence:** Leo L. Lui,  
Department of Physiology, Monash University  
Clayton, VIC 3800, Australia.

**E-mail:** [Leo.Lui@monash.edu](mailto:Leo.Lui@monash.edu)

**Acknowledgements:** This project was funded by the Australian Research Council (DE130100493 to LL; CE140100007 to MR) and by the National Health and Medical Research Council of Australia (GNT1066232 to LL and GNT1083152 to MR). We thank Katrina Worthy for the histological work. We also thank Janssen-Cilag for the donation of sufentanil citrate. KRH was partially supported by an Unrestricted Grant from the Research to Prevent Blindness Foundation to the Flaum Eye Institute at the University of Rochester.

## Motion selectivity in MT after V1 lesions

### 1 **Abstract**

2 The middle temporal area (MT) receives its main afferents from the striate cortex (V1). However, MT  
3 also receives direct thalamic projections, which have been hypothesized to play a crucial role in residual  
4 vision after V1 lesions. MT neurons continue to respond shortly after V1 lesions, but human clinical  
5 work has shown that lesion effects can take up to six months to stabilize, making it important to  
6 understand MT responses after long-term deprivation of V1 inputs. We recorded neuronal responses in  
7 MT to moving dot stimuli in adult marmoset monkeys, 7-11 months after unilateral V1 lesions. Fewer  
8 MT neurons were direction selective, including neurons whose locations corresponded to the intact parts  
9 of V1. Firing rates were higher and more variable, and increased with motion strength regardless of  
10 direction. These properties could be re-created by a network model with imbalanced inhibition and  
11 excitation, providing the first insights into functional implications of long-term plasticity in MT following  
12 V1 lesions.

## Motion selectivity in MT after V1 lesions

### 13 **Introduction**

14 Damage to the striate cortex (V1; primary visual cortex) in adult primates leads to loss of conscious visual  
15 perception, referred to as cortical blindness (Lister and Holmes, 1916). In cases of partial destruction, a  
16 defined scotoma (an “island” of blindness) is created, which precisely follows the topographic  
17 representation of the visual field in V1 (Horton and Hoyt, 1991). Despite the absence of visual sensation,  
18 humans and monkeys with V1 lesions sustained in adulthood often retain a residual ability, termed  
19 “blindsight”, to respond to moving or flickering visual stimuli within the scotomas (Riddoch, 1917;  
20 Klüver, 1936; 1941; Poppel et al., 1973; Sanders et al., 1974; Weiskrantz et al., 1974; Barbur et al., 1993;  
21 Weiskrantz, 1996).

22 The middle temporal area (MT) of extrastriate cortex is a likely neural substrate for mediating the residual  
23 visual motion processing in blindsight. Within weeks of V1 lesions, many neurons in MT still respond in  
24 a direction selective way to oriented bars and gratings presented inside the scotoma (Rodman et al., 1989;  
25 Rosa et al., 2000; Azzopardi et al., 2003; Alexander and Cowey, 2008). However, humans with V1  
26 damage exhibit the greatest rates of visual recovery, without therapeutic intervention, within the first 8  
27 weeks after their lesion; once patients reach 6 months post-V1 damage, they no longer exhibit these  
28 improvements (Zhang et al., 2006). This suggests a change in neuronal responsiveness within spared  
29 visual cortices up to 6 months post-damage. Therefore, characterizing neuronal responses beyond 6  
30 months is critical for understanding how plasticity in the adult visual system may allow for residual  
31 vision.

32 In patients with long-term V1 damage, the ability to determine the direction of complex motion stimuli,  
33 such as moving random dot patterns is extremely poor (Azzopardi and Cowey, 2001; Huxlin et al., 2009;  
34 Das et al., 2014; Cavanaugh et al., 2015). MT neurons in normal animals respond to moving random dot  
35 patterns in a way that directly reflects the animal’s psychophysical performance (Britten et al., 1992). The  
36 behavioral data from patients suggest that responses of MT neurons inside the lesion projection zone  
37 (LPZ; the region of cortex that originally received afferent connections from V1-damaged tissue) must be  
38 degraded after V1 lesions. However, recent studies found that with perceptual training, patients with V1  
39 lesions can recover the ability to discriminate the direction of moving dot patterns (Huxlin et al., 2009;  
40 Das et al., 2014). This suggests that some motion encoding abilities in MT may also persist beyond 6  
41 months post lesion, which can be recruited by directed training. However, the ability of MT neurons to  
42 encode motion after long-term V1 lesions remains unknown.

43 Several lines of evidence suggest functional responses of MT neurons may change due to different types  
44 spontaneous plasticity in the months following V1 lesions. Magnetic resonance imaging and tractography

## Motion selectivity in MT after V1 lesions

45 studies in human patients have found that white matter tracts between the lateral geniculate nucleus and  
46 MT (Ajina et al., 2015) and corpus callosum (Celeghin et al., 2017) adapt to compensate after loss of V1  
47 input. In animal models of brain damage, loss of key sensory inputs has been shown to decrease the  
48 number inhibitory interneuron synapses in the LPZ (Keck et al., 2011), and to strengthen excitatory lateral  
49 connections, both within and outside the LPZ (Darian-Smith and Gilbert, 1994; Palagina et al., 2009;  
50 Yamahachi et al., 2009; Barnes et al., 2017). However, whether such mechanisms affect the responses of  
51 MT neurons has not been investigated.

52 To address these questions, we recorded the response properties of MT neurons to random dot stimuli in  
53 marmoset monkeys 7-11 months following V1 lesions. We confirm the prediction that MT neurons still  
54 respond to random dot patterns long after V1 lesions, although the prevalence of direction selectivity was  
55 significantly reduced and the sensitivity to motion coherence was significantly altered. By developing a  
56 network model of MT, we were able to demonstrate that the observed changes in neural responses were  
57 consistent with underlying changes in inhibition and lateral connectivity.

## Motion selectivity in MT after V1 lesions

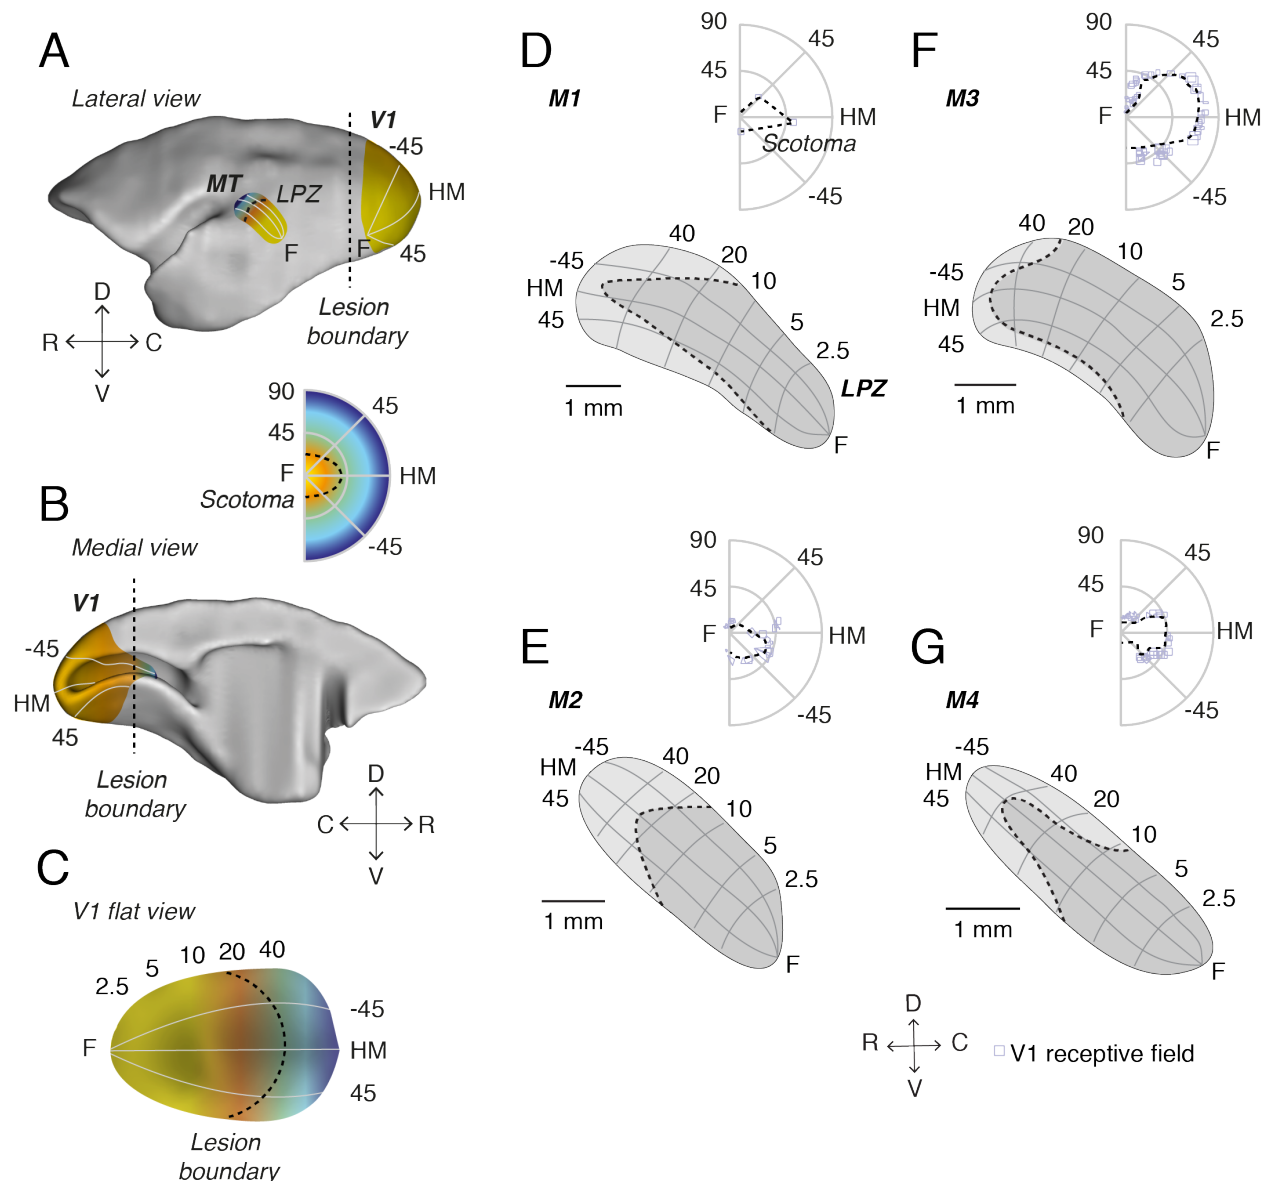

**Figure 1. V1 lesions in adult marmosets.** A, Lateral and B, medial views of a marmoset brain showing the locations of V1 and MT, as well as a C, flat view of V1. Illustrative retinotopic maps have foveal responses in yellow and peripheral responses in blue. Dashed lines illustrate the approximate location of the lesion boundary in V1 (A-C), and the corresponding LPZ in MT (A) and scotoma in the visual field (inset). D-G, V1 recordings were used to define the boundary of the scotoma in each V1-damaged animal and the scotoma was then projected onto the cortical surface representation of MT (see Methods) in order to determine the LPZ for each case. Numbers (degrees) indicate eccentricity (vertical axis) and polar angle (radial axes). The dashed lines indicate LPZ in MT and scotoma in visual field. C, caudal; D, dorsal; R, rostral; V, ventral; F, fovea; HM, horizontal meridian.

## Motion selectivity in MT after V1 lesions

### 59 **Results**

#### 60 **Visual responsiveness and directional selectivity in MT after V1 lesions**

61 The caudal portion of V1 was resected in four adult marmosets (Fig 1A-C, see Methods), which resulted  
62 in a corresponding LPZ in MT (Fig 1A,D-G) and scotoma in the visual field (Fig 1 inset, D-G). The  
63 extent of each scotoma was first determined by mapping the receptive fields of neurons on the edge of the  
64 remaining parts of V1 in all four animals with V1 resections (Fig 1D-G). The scotoma was defined as the  
65 area of the visual field in which V1 receptive fields could no longer be recorded (Fig. 1D-G; dashed  
66 outlines). The scotomas were elongated in shape, encompassed the central visual field, and extended to  
67 approximately 40° eccentricity in the right visual hemifield (Fig 1D-G).

68 We recorded 114 single units and 134 multi-units from MT in four V1-damaged animals, and 36 single  
69 units and 38 multi-units (hereafter ‘units’) from two control animals. In all four V1-damaged animals, we  
70 found direction selective units in MT, both inside and outside the LPZ (Fig 2A-D). However, many units  
71 were not direction selective, and others showed no response to any of the stimuli we used. The majority of  
72 MT units in V1-damaged animals, both inside (73.3%, 115/157 units) and outside (79.1%, 72/91 units)  
73 the LPZ, responded to moving dot patterns. However, the percentage of visually-responsive units was  
74 significantly lower than in the control animals (Control: 97.3%, 72/74 units; compared to: Inside LPZ,  $p =$   
75  $1.10 \times 10^{-21}$ ; Outside LPZ,  $p = 9.91 \times 10^{-9}$ , Binomial distribution). Units with no visual response were  
76 excluded from further analysis. Consistent with previous studies (Eysel and Schweigart, 1999; Eysel et  
77 al., 1999; Rosa et al., 2000), we found that the majority of units (85.2%, 98/115 units) located inside the  
78 LPZ (which were expected to have receptive fields inside the scotomas according to the normal  
79 retinotopic organization of MT) had receptive fields displaced to the borders of the scotoma (Fig 2A-D).

80 We further divided responsive units based on direction selectivity. As expected, the majority of units in  
81 control animals were direction selective (Fig 2E, DS units: mean = 68.2%). However, significantly fewer  
82 MT units were direction selective in animals with a V1 lesion. This was true both outside (DS units: mean  
83 = 38.9%,  $p = 1.8 \times 10^{-5}$ , Binomial distribution) and inside (DS units: mean = 33.9%,  $p = 2.15 \times 10^{-19}$ ) the  
84 LPZ, although the prevalence of direction selective units was higher outside than inside the LPZ ( $p =$   
85 0.02).

86 Although fewer MT units were direction selective in V1-damaged animals, there remained some highly  
87 direction selective units both outside (Fig 3A) and inside (Fig 3B) the LPZ, similar to controls (Fig 3C).  
88 To quantify the directional response in MT, we measured the direction selectivity index and circular

## Motion selectivity in MT after V1 lesions

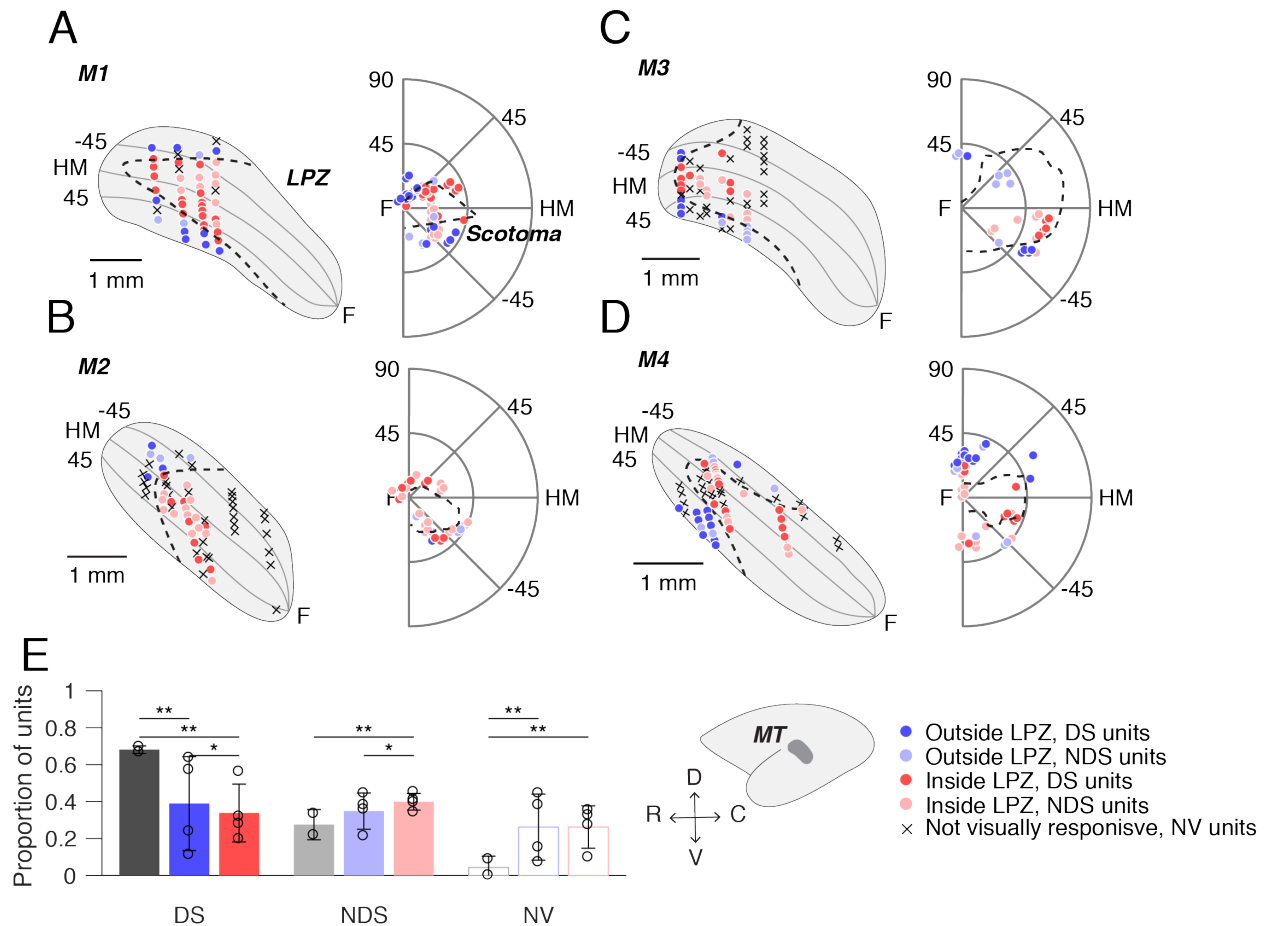

**Figure 2. Direction selectivity in MT after V1 lesions.** A-D, Anatomical locations of units recorded from MT and their respective receptive fields locations in the visual field in four adult marmosets (M1-M4, respectively) with V1 lesions. Each point indicates one unit in MT or one stimulus center. Dark colors indicate direction selective units (DS), light circles indicate units that were visually responsive but not direction selective (NDS). Red points indicate units recorded inside the LPZ and blue points indicate units outside the LPZ. Crosses indicate units that were not visually responsive (NV). Dashed lines indicate the LPZ in MT and the scotoma in the visual field. F, fovea; HM, horizontal meridian. Inset shows the position of MT on the cortical surface. E, Distribution of direction selective (DS), non-direction selective (NDS), and non-visually responsive (NV) units in control animals (grey) and in V1-damaged animals separated by whether the unit was located outside the LPZ (blue) or inside (red). Circles on each bar show percentages for individual subjects. Error bars indicate standard deviation. Stars indicate significance (one star:  $p < 0.05$ , two stars:  $p < 0.01$ , Binomial distribution).

Motion selectivity in MT after V1 lesions

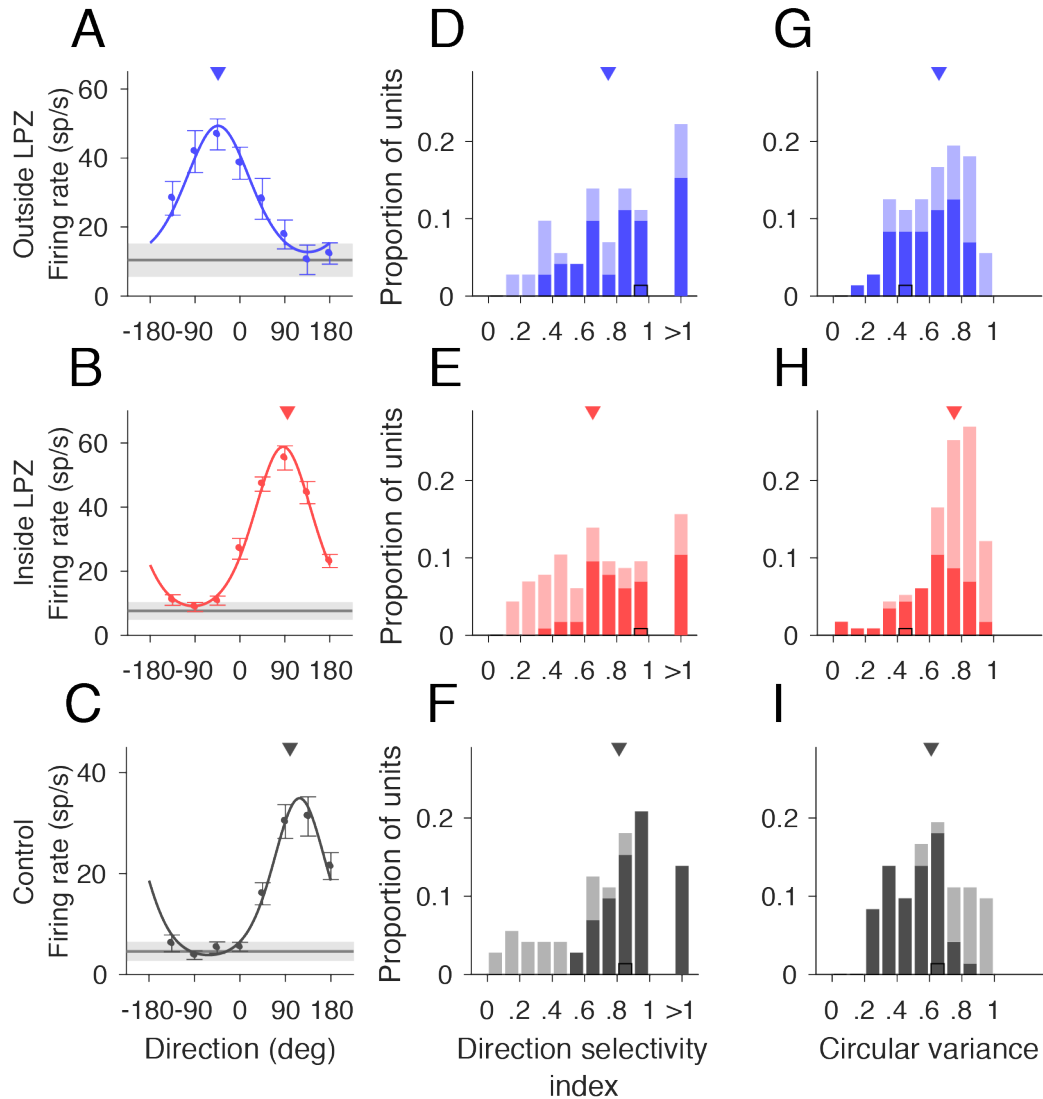

**Figure 3. MT units inside LPZ are less direction selective.** A-C, Three examples of direction selective units outside the LPZ, inside the LPZ, and in a control animal, respectively. Error bars indicate standard error, lines indicate fit of von Mises distribution, triangles indicate preferred direction. Grey line indicates mean spontaneous firing rate, shaded region indicates standard error. D-F, Direction selectivity index and G-I, Circular variance for units located outside the LPZ ( $n = 72$  units), inside the LPZ ( $n = 115$  units), and for the two control animals ( $n = 72$  units), respectively. Darker bars indicate direction selective units, lighter bars indicate non-direction selective units. Black outlines indicate example units shown in A-C. Triangles indicate median of distribution.

89



## Motion selectivity in MT after V1 lesions

90 variance. Units outside the LPZ in V1-damaged animals did not have significantly lower direction  
91 selectivity indices (Fig 3D, median = 0.74) in comparison with those from control animals (Fig 3F,  
92 Control, median = 0.81,  $p = 0.78$ , Wilcoxon's rank sum). In comparison, units inside the LPZ had a  
93 significantly different distribution of direction indices, which was biased towards low values (Fig 3E,  
94 median = 0.65,  $p = 0.02$ ). Likewise, the circular variance was significantly higher, indicating reduced  
95 direction selectivity, for units inside the LPZ compared to units outside the LPZ (Fig 3G, Outside LPZ:  
96 median = 0.66; Fig 3H, Inside LPZ: median = 0.75,  $p = 1.94 \times 10^{-3}$ ) as well as to control units (Fig 3I,  
97 median = 0.61,  $p = 4.83 \times 10^{-5}$ ). The circular variance of units outside the LPZ was not significantly  
98 different than controls ( $p = 0.27$ ). Therefore, direction selectivity was reduced for units located inside the  
99 LPZ.

### 100 **Impact of motion coherence on MT responses after V1 lesions**

101 For typical direction selective MT units, firing rates increase with motion strength (i.e. coherence) in the  
102 preferred direction and decrease with motion strength in the null direction (e.g., Fig 4C, (Britten et al.,  
103 1992; Chaplin et al., 2017)). After V1 lesions, the majority of MT units tested for sensitivity to motion  
104 coherence, both direction selective and non-direction selective, did not show the expected monotonic  
105 relationship between firing rate and coherence. Instead, units both outside (Fig 4A) and inside (Fig 4B)  
106 the LPZ showed a “U-shaped” response to changes in motion coherence, meaning that firing rates were  
107 highest for motion at 100% coherence, regardless of stimulus direction.

108 To quantify this curve shape, we calculated the z-score between firing rates at 100% coherence and 0%  
109 coherence for the preferred and null direction. Units with U-shaped responses had significantly positive z-  
110 scores ( $< 1.96$ ) for both the preferred and null direction (Top right quadrant of Fig 4D-F). Units with  
111 traditional linear responses had significantly positive z-scores in the preferred direction and negative z-  
112 scores in the null direction (Top left quadrant of Fig 4D-F). The majority of units both outside the LPZ  
113 (Fig 4D, 43/49, 87.5%, median = 4.53,  $p = 0.82$ , Wilcoxon's rank sum, compared to controls) and inside  
114 the LPZ (Fig 4E, 57/87, 65.5%, median = 3.68,  $p = 0.02$ ) showed significant increases in firing rate to the  
115 100% coherent stimulus in the preferred direction, like control animals (Fig 4F, 44/54, 81.5%, median =  
116 4.69). However, unlike controls, a significant percentage of units in V1-damaged animals also showed  
117 positive z-scores in the null direction (Outside LPZ: 24/49, 48.9%, median = 1.79,  $p = 8.47 \times 10^{-6}$ ; Inside  
118 LPZ: 38/87, 43.6%, median = 1.43,  $p = 1.08 \times 10^{-6}$ ; Control: 5/54, 9.3%, median = -1.25). Notably, this  
119 was true for both direction selective and non-direction selective units. Therefore, the majority of MT units  
120 in V1-damaged animals were sensitive to motion coherence, regardless of stimulus direction.

## Motion selectivity in MT after V1 lesions

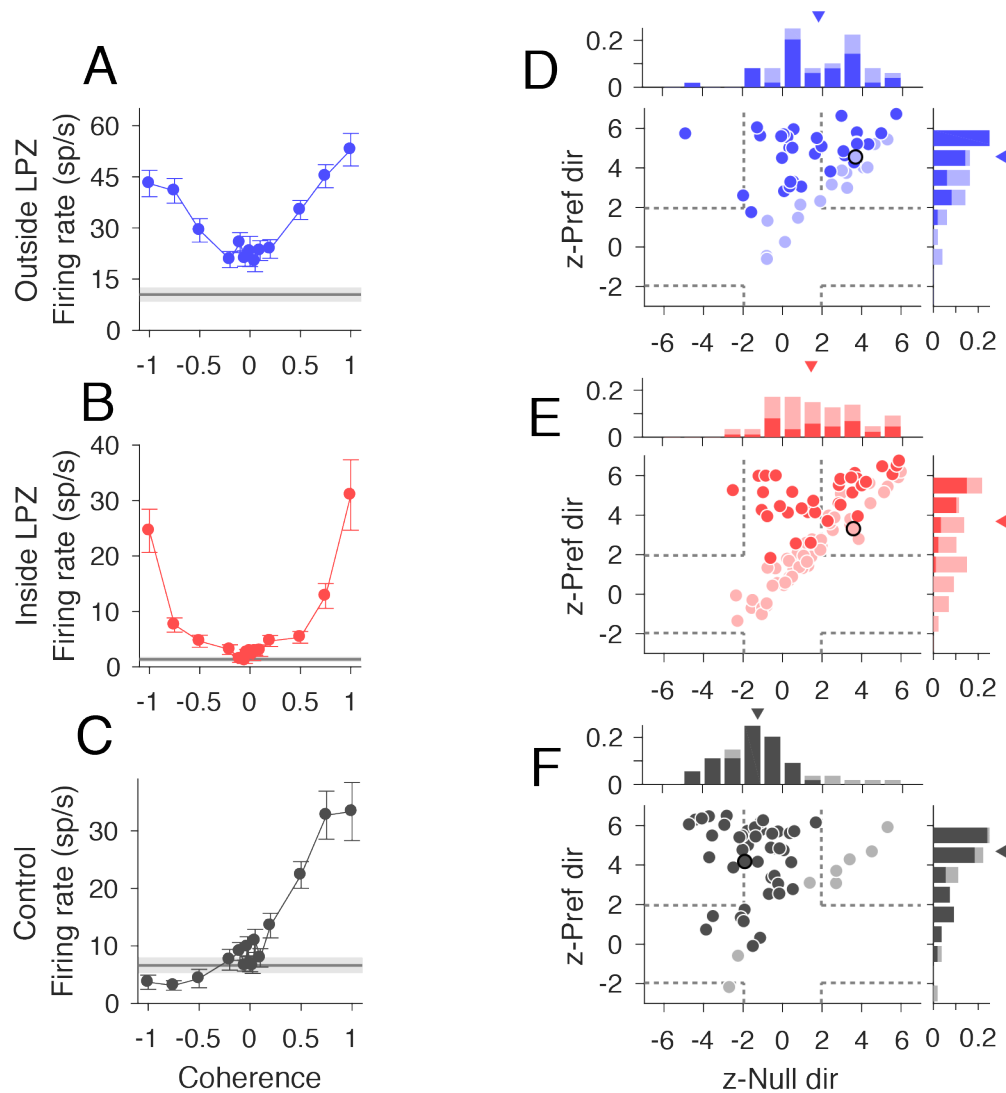

**Figure 4. Responses to motion coherence after V1 lesions.** A-C, Neural responses from three example units (outside the scotoma, inside the scotoma, and from a control animal, respectively) that showed typical responses for each population to motion coherence. Stimulus motion in the preferred direction is indicated by positive coherence values and in the null direction by negative coherence values. Average spontaneous firing rate indicated by the grey line; shaded area indicates standard error. D-F Scatter plots of z-scored firing rates for units located outside the LPZ ( $n = 49$  units), inside the LPZ ( $n = 87$  units), and for the control animals ( $n = 54$  units), respectively. The y-axis shows the z-score for the firing rate difference between a stimulus with 100% coherence in the preferred direction and a stimulus with 0% coherence. The x-axis shows the z-score for the firing rate difference between a stimulus with 100% coherence in the null direction and a stimulus with 0% coherence. Each circle represents one unit. Darker circles indicate direction selective units, lighter circles indicate non-direction selective units. Black outlines indicate example units shown in A-C; Dashed grey lines indicate the significance threshold for each z-score ( $\pm 1.96$ ). Histograms show the distribution of z-scores for each axis. Triangle indicates median z-scores.

Motion selectivity in MT after V1 lesions

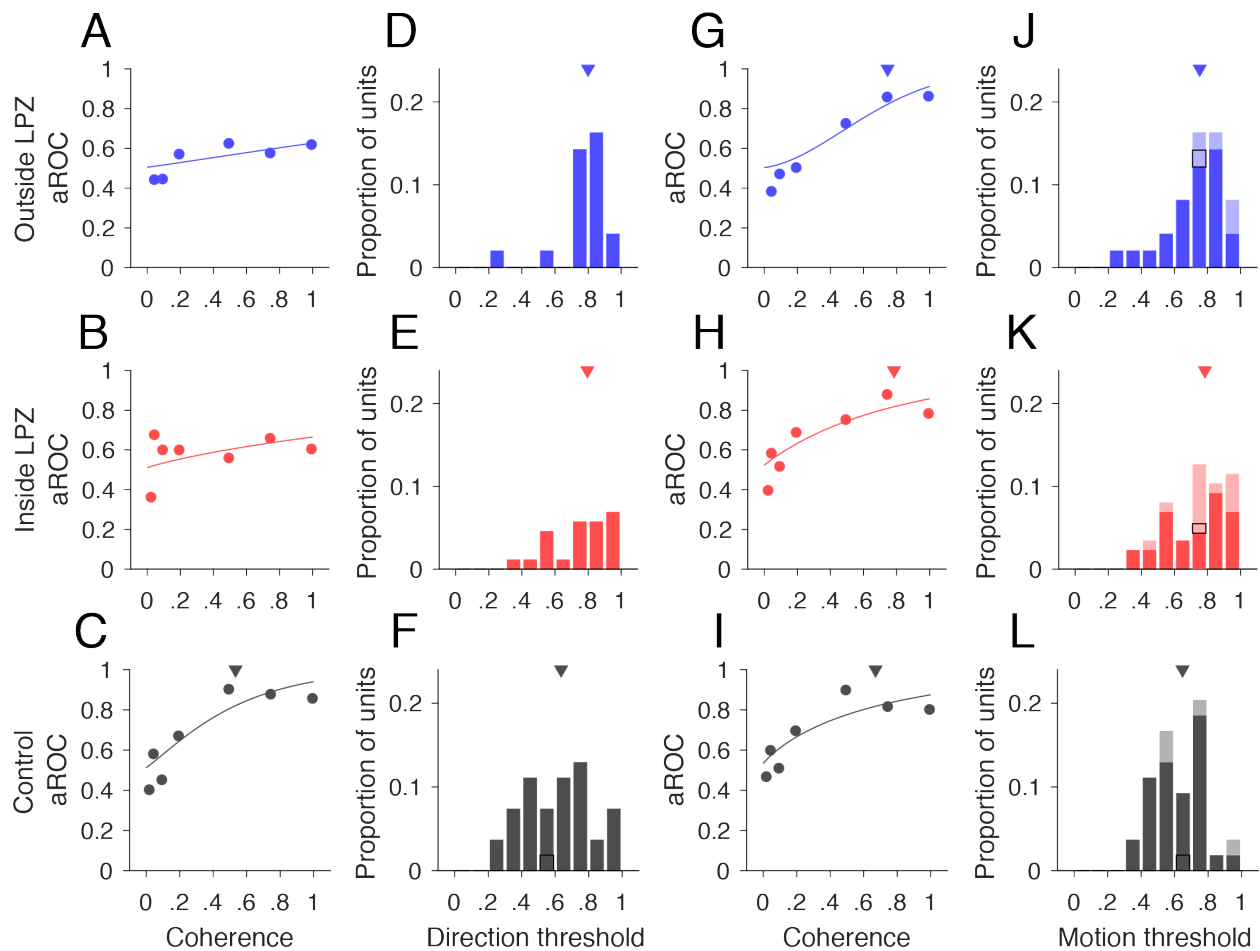

**Figure 5. Direction thresholds and motion thresholds.** A-C, Neurometric curves, data points indicate aROC values (preferred vs. null response) at each coherence for the same example units shown in Fig 5 A-C. The line indicates the best-fitting Weibull curve. Triangle in C shows the direction threshold coherence at which the curve reaches an aROC value of 0.82. D-F, Distributions of units with direction thresholds located outside the LPZ ( $n = 19/49$  units), inside the LPZ ( $n = 23/87$  units), and for the two control animals ( $n = 35/54$  units), respectively.. Black outlines indicate example units shown in A-C. Triangles indicate median threshold for each population. G-I, Neurometric curves, data points indicate aROC values (preferred vs. zero coherence response) at each coherence for same example units shown in Fig 5 A-C. All conventions as in A-C. J-L, Distributions of units with motion thresholds located outside the LPZ ( $n = 29/49$  units), inside the LPZ ( $n = 45/87$  units), and for the two control animals ( $n = 36/54$  units), respectively. All conventions as in D-F.

## Motion selectivity in MT after V1 lesions

### 122 **Sensitivity to stimulus noise is impaired after V1 lesions**

123 In macaques, it has been shown that the sensitivity of individual MT units is comparable to human  
124 behavioral performance when discriminating direction of noisy, random dot stimuli (Britten et al., 1992).  
125 Here, we asked whether the responses of MT units in chronic, V1-damaged animals are consistent with  
126 abnormal processing of stimulus noise, as was shown in humans with chronic V1 lesions (Azzopardi and  
127 Cowey, 2001; Huxlin et al., 2009; Das et al., 2014). We quantified the information carried by the firing  
128 rates of each unit by fitting a neurometric function and defining a direction threshold which was the  
129 coherence at which the performance was 0.82 (see Methods). Significantly fewer units in V1-damaged  
130 animals had direction thresholds (Fig 5A, example unit; Outside LPZ: 19/49, 38.8%,  $p = 1.22 \times 10^{-4}$ , Fig  
131 5B, example unit; Inside LPZ: 23/87, 26.4%,  $p = 2.77 \times 10^{-13}$ , Binomial distribution) compared to control  
132 animals (Fig 5C, example unit; 35/54, 64.8%). Furthermore, the distribution of direction thresholds was  
133 significantly higher for units both outside the LPZ (Fig 5D; median = 0.80,  $p = 2.08 \times 10^{-3}$ , Wilcoxon's  
134 rank sum) and inside the LPZ (Fig 5E, median = 0.79,  $p = 7.94 \times 10^{-3}$ ) in comparison with controls (Fig 5F,  
135 median = 0.63). In summary, in line with the reduced direction selectivity, the sensitivity to direction in  
136 noise of MT units was substantially reduced in V1-damaged animals.

137 Given that the majority of units in V1-damaged animals still showed significant increases in firing rate in  
138 response to increases in motion coherence, regardless of direction selectivity, we next compared the firing  
139 rate at each coherence in the preferred direction to the firing rate to the 0% coherence stimulus (Chaplin et  
140 al., 2017). This metric calculates the ability of the unit to detect motion, regardless of the direction. As for  
141 the direction thresholds, we defined the coherence at which the aROC curve reached 0.82 to be the unit's  
142 motion threshold (Fig 5G-I). A greater percentage of units reached the motion threshold compared to the  
143 direction threshold, although for units with inside LPZ there were still significantly fewer that reached  
144 threshold compared to controls (Outside LPZ: 29/49, 59.2%,  $p = 0.06$ , Binomial distribution; Inside LPZ:  
145 45/87, 51.7%,  $p = 1.37 \times 10^{-3}$ ; Control: 36/54, 66.7%). The distributions of motion thresholds were also  
146 significantly higher than in controls for both units inside and outside the LPZ (Fig 6J, Outside LPZ:  
147 median = 0.75,  $p = 4.27 \times 10^{-3}$ , Wilcoxon's rank sum; Fig 5K, Inside LPZ: median = 0.78,  $p = 3.91 \times 10^{-3}$ ;  
148 Fig 5L, Control: median = 0.65). This indicates that the majority of units in animals with V1 lesions retain  
149 sensitivity to the strength of global motion, regardless of whether the unit is sensitive to the direction of  
150 motion.

### 151 **MT firing rates are higher and more variable after V1 lesions**

152 Metrics of direction selectivity and motion selectivity are dependent on the firing rates of units (Chaplin  
153 et al., 2017). If loss of V1 input reduces the overall firing rate of units inside the LPZ, this factor could

## Motion selectivity in MT after V1 lesions

154 account for the reduced prevalence of selectivity in MT. In fact, we found that firing rates were  
155 significantly higher in V1-damaged animals, compared to controls. Spontaneous rates were significantly  
156 higher outside the LPZ (Fig 6A, median spontaneous rate = 11.9 sp/s,  $p = 6.72 \times 10^{-8}$ ) as well as inside the  
157 LPZ (Fig 6B, median spontaneous rate = 14.2 sp/s,  $p = 3.51 \times 10^{-9}$ ; Fig 6C, Control: median spontaneous  
158 rate = 4.0 sp/s). Surprisingly, units in V1-damaged animals, as a population, did not have a significant  
159 visual response to stimulus with 0% motion coherence. In control animals, the response to a 0%  
160 coherence stimulus was typically above the spontaneous rate (median 0% rate = 8.8 sp/s;  $p = 4.32 \times 10^{-5}$ ).  
161 In V1-damaged animals, this difference was not significant (Outside LPZ: median 0% rate = 20.1 sp/s,  $p$   
162 = 0.07; Inside: median 0% rate = 21.2 sp/s,  $p = 0.17$ ). This indicates that in V1-damaged animals, units  
163 were generally not visually responsive to stimuli that contained no net motion signal.

164 In addition to having higher spontaneous firing rates, MT units in V1-damaged animals had higher firing  
165 rates in the preferred and null directions as well (Fig 6D, Outside LPZ: median preferred rate = 63.5 sp/s,  
166  $p = 3.28 \times 10^{-6}$ , median null rate = 32.5 sp/s,  $p = 7.07 \times 10^{-10}$ ; Fig 6E, Inside LPZ: median preferred rate =  
167 81.1 sp/s,  $p = 1.65 \times 10^{-4}$ , median null rate = 42.6 sp/s,  $p = 3.52 \times 10^{-11}$ , Wilcoxon's rank sum), compared to  
168 units in control animals (Fig 6F, median preferred rate = 35.8 sp/s, median null rate = 5.8 sp/s). Therefore,  
169 for most units in V1-damaged animals, we did not find that the lack of direction selectivity or motion  
170 sensitivity was due to a decrease in the firing rate of units in V1-damaged animals. Rather, the reduced  
171 direction selectivity was driven by increased firing rates in the null direction.

172 In addition to analyzing the mean firing rate, we calculated the mean-matched Fano factor for single units  
173 across the trial (see Methods) to estimate whether variability in firing rate changes after loss of V1 input.  
174 While units still showed the characteristic dip in Fano factor at stimulus onset (Churchland et al., 2010),  
175 Fano factors remained high in the single units from V1-damaged animals. In fact, Fano factors were  
176 significantly higher in V1-damaged animals regardless of whether units were inside or outside the LPZ  
177 (Outside LPZ: Spontaneous median = 3.13,  $p = 1.0 \times 10^{-14}$ ; Stimulus? median = 2.08,  $p = 6.65 \times 10^{-17}$ ,  
178 Wilcoxon's rank sum; Inside LPZ: Spont. median = 2.78,  $p = 2.03 \times 10^{-16}$ ; Stim. median = 2.09,  $p =$   
179  $1.91 \times 10^{-19}$ ) compared to controls (Spont. median = 1.61; Stim. median = 1.25). In summary, firing rates  
180 were both higher and more variable in V1-damaged animals, which may reflect changes in the balance of  
181 local excitation (Litwin-Kumar and Doiron, 2012), as has been previously observed following loss of  
182 sensory input (Keck et al., 2011; Barnes et al., 2017).

## Motion selectivity in MT after V1 lesions

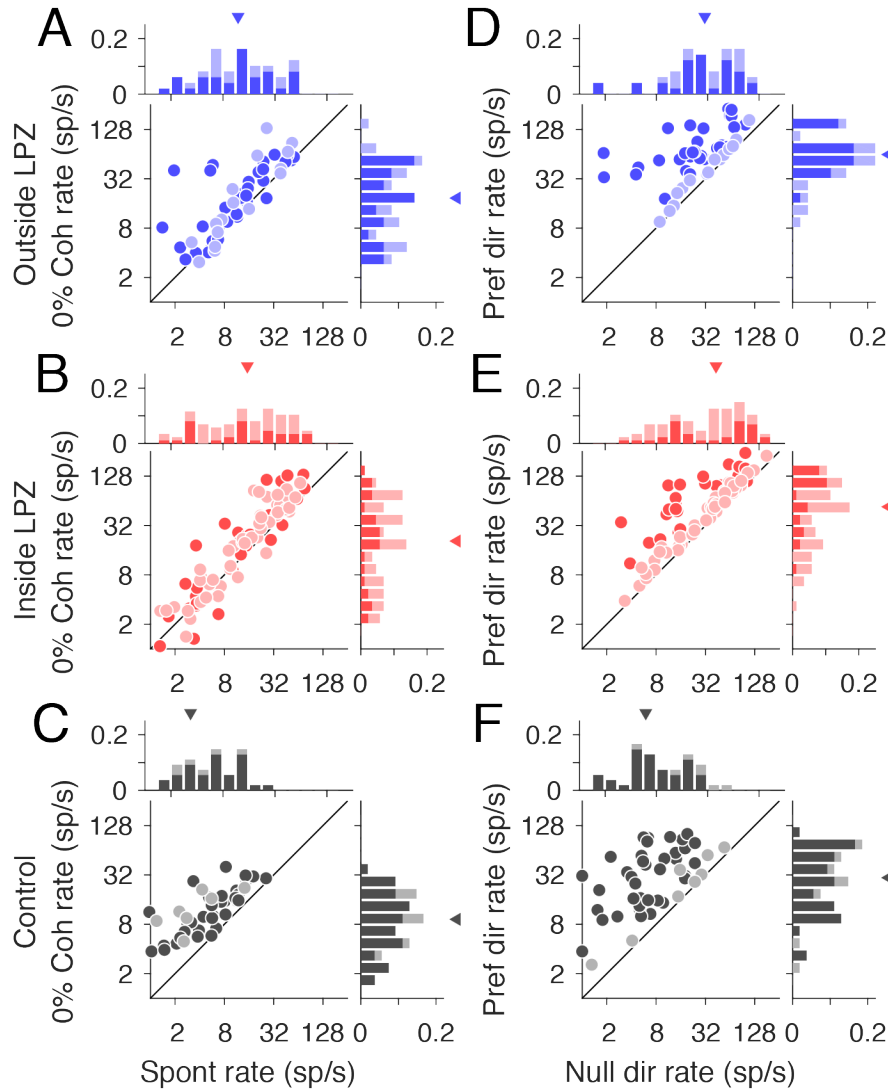

**Figure 6. Firing rate differences in V1-damaged and control animals.** A-C Spontaneous firing rates (x-axis) compared to firing rates for the 0% coherence stimulus (y-axis) for units located outside the LPZ (n = 49 units), inside the LPZ (n = 87 units), and for the two control animals (n = 54 units), respectively. D-F, Firing rates in the null direction (x-axis) compared to preferred (y-axis). Darker circles indicate direction selective units, lighter circles indicate non-direction selective units. Histograms show the distribution of firing rates for each axis. Darker bars indicate direction selective units, lighter bars indicate non-direction selective units. Triangles indicate median rate.

## Motion selectivity in MT after V1 lesions

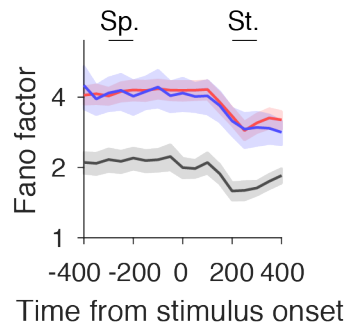

**Figure 7. Mean-matched Fano factors in V1-damaged and control animals.** Mean-matched Fano factors across the trial for units with receptive fields outside scotoma (blue, n = 124 conditions), inside scotoma (red, n = 256 conditions) and from control animals (grey, n = 192 conditions). Error bars indicate 95% confidence intervals. Sp.,spontaneous interval; St., stimulus interval.

## Motion selectivity in MT after V1 lesions

### 183 **Modeling E-I imbalances inside the LPZ**

184 Finally, to determine the extent to which altered MT responses may be driven by input into MT compared  
185 to local changes in the balance of excitation and inhibition (E-I), we developed a biophysical network  
186 model of MT. The model was composed of excitatory and inhibitory, leaky-integrate-and-fire neurons,  
187 containing two excitatory populations (Fig 8A, E1 and E2) that were tuned to opposite directions of  
188 motion. Excitatory and inhibitory populations were reciprocally connected (probability of connection =  
189 0.2). Under balanced E-I conditions, E1 and E2 showed monotonic increases to changes in stimulus  
190 coherence in their respective preferred directions (Fig 8B, mean response for each population) and the  
191 spontaneous rates were low (mean rate = 1.91 sp/s), similar to MT responses in control animals. By  
192 modeling the stimulus as a time-varying direct input to each neuron, consisting of a visual component and  
193 direction selective component (see Methods), we were able to manipulate this direct input to be direction  
194 selective visual input, non-direction selective visual input, or non-visual input (Fig 8A). We were then  
195 able to create sub-populations of E1 and E2 that were “inside” or “outside” the LPZ by manipulating the  
196 input into those neurons. Half of the neurons in the pool were “outside” the LPZ; these always received  
197 the standard visual and direction selective stimulus inputs. The other half consisted of neurons “inside”  
198 the LPZ. We tested whether cells inside the LPZ that received direction selective visual input, non-  
199 direction selective visual input, or non-visual inputs best reproduced our observed data. We also  
200 compared balanced E-I connections to imbalanced E-I connections. In the latter condition, inhibitory  
201 synapses were reduced and excitatory lateral connections were strengthened, as has been observed  
202 experimentally (Darian-Smith and Gilbert, 1994; Palagina et al., 2009; Yamahachi et al., 2009; Keck et  
203 al., 2011). Because the responses of E1 and E2 were mirrored (Fig 8B), for clarity, only the results of  
204 population E2 (neurons that preferred the positive direction on the x-axes) are shown.

205 In the balanced E-I network, the spontaneous rates were unchanged from the control conditions (mean  
206 spontaneous rate = 2.01 sp/s;  $p = 0.27$ , Wilcoxon’s rank sum). The population response of neurons  
207 outside the LPZ maintained a consistent monotonic response to coherence, regardless of input into the  
208 LPZ (Fig 8C-E). Neurons inside the LPZ also showed a monotonic response to coherence when receiving  
209 direction selective inputs, as expected (Fig 8C), but showed a flat response when only receiving non-  
210 direction selective inputs (Fig 8D) or non-visual input (Fig 8E). This did not match the observations in the  
211 V1-damaged animals.

212 While maintaining the same inputs, we then manipulated the probability of connections in the network  
213 (see Methods) to create an E-I imbalance. As a result, the firing rates increased, including the spontaneous  
214 rates (mean spontaneous rate = 12.21 sp/s,  $\neq 0$ , Fig 8F-H), as observed experimentally (Fig 6).



## Motion selectivity in MT after V1 lesions

215 Furthermore, when input into the LPZ was either direction selective (Fig 8F) or not visually responsive  
216 (Fig 8H), the responses to motion coherence in the null direction increased, as was observed  
217 experimentally, although this was only significant for non-visual inputs (Fig 8F, Inside DS, Null rate at  
218 100% coherence vs 0% coherence,  $p = 0.48$ ; Fig 8H, Inside NV,  $p = 0.02$ , Wilcoxon's rank sum). In the  
219 case of direction selective input, this was true for neurons outside the LPZ as well, although this was also  
220 not significant (Fig 8F, Outside DS,  $p = 0.91$ ). When the input into the LPZ was non-direction selective,  
221 the responses to motion coherence became flat (Fig 8G), as in the balanced network condition. Therefore,  
222 our modeling results suggest that the observed responses in MT may be due to an imbalance in excitation  
223 and inhibition caused by the V1 lesion, and that the input into the LPZ is likely to be a mix of direction  
224 selective and non-selective inputs.

## Motion selectivity in MT after V1 lesions

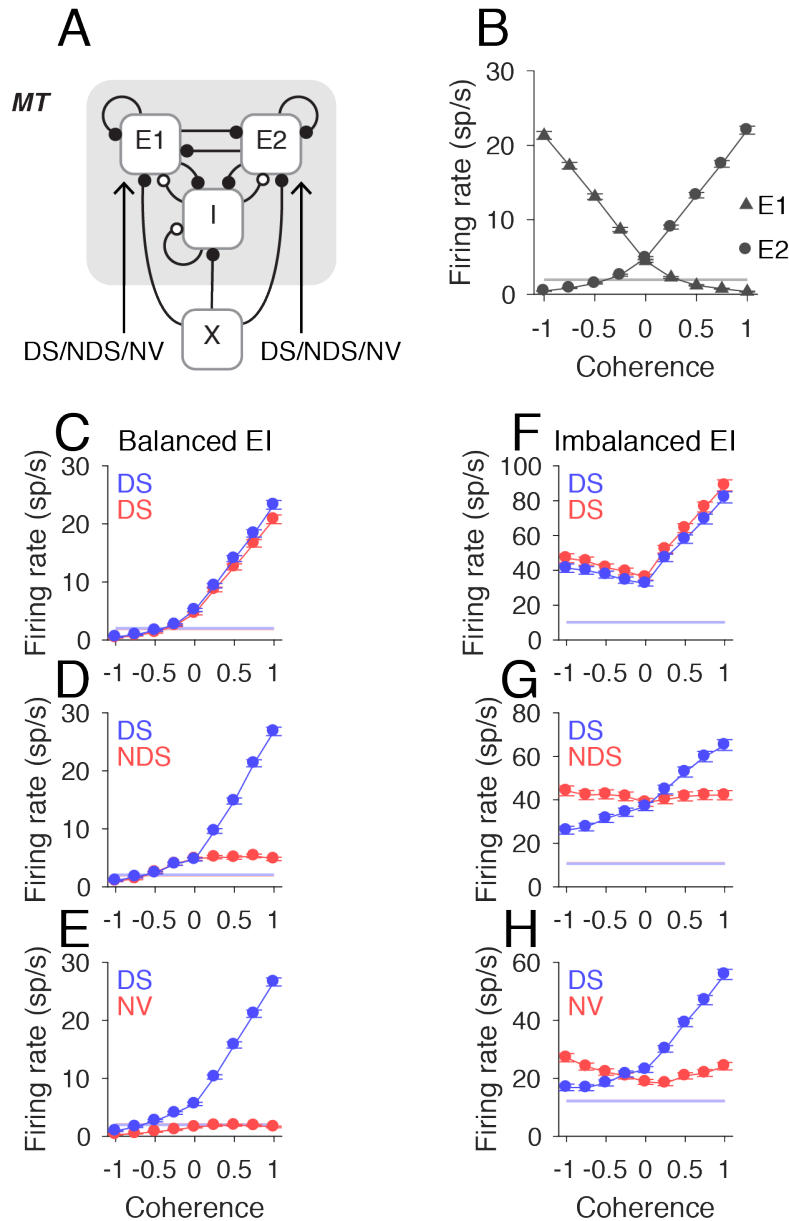

**Figure 8. Network model of LPZ.** A, Schematic of network model for an MT-like circuit composed of two populations of excitatory neurons (E1, E2) tuned to opposite directions of motion and reciprocally connected inhibitory (I) neurons. Each population receives an external Poisson signal (X). The excitatory populations also receive sensory input, which may be direction selective visual input (DS), non-direction selective visual input (NDS), or non-visual input (NV). B, Population mean firing rates for E1 neurons (triangles,  $n = 800$ ) and E2 neurons (circles,  $n = 800$ ) in response to varying motion coherence in two directions. Grey line indicates mean spontaneous rate, error bars indicate standard error. C-E, Population mean firing rates for E2 neurons “outside” the LPZ (blue circles,  $n = 400$ ) and “inside” the LPZ (red circles,  $n = 400$ ) in the balanced E-I network where the neurons “outside” the LPZ received direction selective input (DS) and the neurons inside the LPZ received either direction selective visual input (DS), non-direction selective visual input (NDS) or non-visual input (NV), respectively. Circles indicate mean population rate, error bars show standard error. F-G Population mean firing rates for E2 neurons in the imbalanced E-I network. All other conventions the same as C-E.

## Motion selectivity in MT after V1 lesions

### 225 **Discussion**

226 In order to understand the long-term consequences of V1 lesions, we recorded responses in MT to moving  
227 random dot patterns in adult marmoset monkeys. More than 7 months after the lesions, we found that  
228 fewer units in MT were direction selective, regardless of whether they were located inside or outside the  
229 LPZ. At the same time, sensitivity to motion coherence was largely preserved, even for a large number of  
230 non-direction-selective units. Therefore, a considerable amount of motion processing is still carried out in  
231 MT, despite the decreased direction selectivity. Interestingly, the firing rates of the cells were higher and  
232 more variable in V1-damaged animals. These observations were predicted by a network model, in which  
233 the balance of excitatory and inhibitory connections within MT changed after chronic V1 lesions.  
234 Together, these results provide novel insights to the underlying mechanisms of neural changes after  
235 chronic V1 damage.

### 236 **Motion selectivity in MT after V1 lesions**

237 Consistent with previous work (Rodman et al., 1989; Rosa et al., 2000; Azzopardi et al., 2003), our data  
238 confirmed the preservation of a group of direction-selective MT units inside the LPZ. However, we found  
239 fewer direction-selective cells in MT compared to previous studies, although the latter were done at  
240 shorter time scales after V1 lesions and used oriented bars and gratings as opposed to random dot  
241 patterns. Both time since damage and choice of stimulus may account for differences found in the present  
242 study. In addition, we observed robust (albeit abnormal) sensitivity to motion coherence, despite the  
243 reduced direction selectivity. The increased direction thresholds for noisy moving dot stimuli were also  
244 indicative of reduced direction selectivity. These findings are consistent with the notion that direction  
245 selectivity in MT may be generated in V1 (Movshon and Newsome, 1996).

246 Surprisingly, we found decreased direction selectivity and abnormal sensitivity to motion coherence in  
247 neurons located both inside and outside the LPZ. Previous work in adult animals with short-term V1  
248 damage had found neural responses in the region outside the LPZ to be largely preserved, using bar and  
249 square-wave grating stimuli (Rosa et al., 2000). Because MT receptive fields have a finite size (Rosa and  
250 Elston, 1998), it is likely that neurons near the estimated boundary of the LPZ receive different degrees of  
251 input from the remaining parts of V1. Likewise, the receptive fields of cells inside the LPZ tended to be  
252 closer to and often overlapped the scotoma border, as has been previously reported following cortical  
253 (Rosa et al., 2000; Giannikopoulos and Eysel, 2006) and retinal lesions (Schmid et al., 1996). Thus, the  
254 surviving responses inside the LPZ in MT may be dependent on proximity to units outside the LPZ,  
255 which still receive inputs from V1. Together, these results are indicative of potentially widespread

## Motion selectivity in MT after V1 lesions

256 changes in the connectivity of units in MT, or at least a substantial change in the balance of inputs  
257 previously present, both inside and outside the LPZ, after V1 lesions.

### 258 **MT connectivity after V1 lesions**

259 In addition to inputs from V1 and extrastriate cortical areas, MT also receives direct subcortical input  
260 from the koniocellular layers of the lateral geniculate nucleus in both macaques (Sincich et al., 2004) and  
261 marmosets (Warner et al., 2010). Many neurons in these layers have “cortical like” response properties  
262 (White et al., 2001; Solomon et al., 2010), including direction selectivity (Cheong et al., 2013), although  
263 these properties may be dependent on cortical feedback. MT also receives input from the inferior pulvinar  
264 nucleus (Berman and Wurtz, 2010; 2011). Both the lateral geniculate nucleus (Bridge et al., 2010; Schmid  
265 et al., 2011; Ajina et al., 2015) and the pulvinar (Rodman et al., 1990; Warner et al., 2012; 2015) have  
266 been implicated in the preservation of MT responses after V1 damage. Many neurons in the LPZ of the  
267 lateral geniculate nucleus degenerate over the first several months after V1 lesions (Atapour et al., 2017),  
268 whereas the projections to MT appear to be preserved (Bridge et al., 2008; Ajina et al., 2015). Together,  
269 these results suggest that subcortical inputs to MT may also contribute to residual responses in MT after  
270 V1 lesions, particularly for responses observed well inside the scotoma.

271 It is also possible that changes in local connectivity occur following V1 lesions. Shorter-term lesions and  
272 temporary inactivation studies of V1 have reported lower firing rates in MT, particularly for units inside  
273 the LPZ (Rodman et al., 1989; Girard et al., 1992). Contrary to this, we found higher than normal firing  
274 rates (both spontaneous and stimulus-induced) in MT more than 6 months post-V1 damage. We also  
275 found that the Fano factors for MT single units in V1-damaged animals were significantly higher than  
276 those of controls. Previous modeling work has suggested that high Fano factors can be achieved via “over  
277 clustering” of excitatory responses (Litwin-Kumar and Doiron, 2012). It may be the case that after V1  
278 lesions, the units that remain active become more inter-connected with one another, leading to higher  
279 variability and broader directional tuning. Previous studies have found that a lack of sensory input  
280 decreases the number of inhibitory interneuron synapses (Keck et al., 2011), and hyper-excitability has  
281 been observed following retinal lesions (Giannikopoulos and Eysel, 2006). Furthermore, strengthening of  
282 excitatory lateral connections from within the LPZ and from neighboring cortical areas has been observed  
283 after loss of sensory input (Darian-Smith and Gilbert, 1994; Palagina et al., 2009; Yamahachi et al.,  
284 2009). Consistent with this, our network model suggests that an E-I imbalance, driven by increased  
285 excitability of lateral interactions and decreased probability of inhibitory synapses, could explain the  
286 observed decreased direction selectivity, “U-shaped” response to motion coherence and increased firing  
287 rates, independent of any additional input into the LPZ of MT. Neurons located near the LPZ boundary

## Motion selectivity in MT after V1 lesions

288 may still receive a greater proportion of direction-selective input from V1 than neurons further from the  
289 boundary, but our model suggests that these responses would also become “U-shaped” under imbalanced  
290 E-I conditions.

### 291 **Implications for adult humans with V1 damage**

292 Patients who suffer damage to V1 usually experience a period of spontaneous behavioral recovery, which  
293 may last up to six months (Zhang et al., 2006). The majority of hemianopic studies characterize  
294 behavioral performance after this period, when the visual field defect has stabilized. The results of the  
295 present study, performed more than 6 months post-lesion, provide the most meaningful comparisons to  
296 date between non-human primate MT physiology and the behavioral performance of hemianopic patients.  
297 The one previous study performed on a similar timescale found no visual responses inside the scotoma of  
298 New World monkeys (Collins et al., 2003), a result that may be linked to the use of different anesthetics  
299 (Girard et al., 1992). We also found a high percentage of units that were unresponsive to our stimulus,  
300 which would likely have had receptive fields inside the scotoma before the lesion, based on their  
301 anatomical location within MT.

302 Hemianopic patients cannot easily discriminate the direction of motion of random dot stimuli (Azzopardi  
303 and Cowey, 2001), a result that correlates well with the poor direction selectivity we observed in similar  
304 conditions. However, recent studies have found that perceptual training protocols can lead to  
305 improvements in global motion discrimination in cortically blind patients (Sahraie et al., 2006; Raninen et  
306 al., 2007; Huxlin et al., 2009; Sahraie et al., 2010; Das et al., 2014). For this to occur, there must be  
307 neurons with sufficient motion encoding that can be recruited. The robust sensitivity to motion coherence  
308 we find in our data and the few remaining direction selective cells suggest that MT is a likely site to  
309 mediate these perceptual improvements. The responses we recorded along the border of the scotoma are  
310 also consistent with the finding that functional recovery with perceptual training in patients with chronic  
311 V1 lesions occurs primarily at the edges of the scotoma (Cavanaugh and Huxlin, 2017).

312 Taken together, our findings demonstrate that the rudiments of global motion processing persist in area  
313 MT of marmosets with long-standing (>6 months) V1 lesions. The functional changes we observed are  
314 consistent with long-term changes in the structural inputs into MT neurons. These changes may provide  
315 the infrastructure for continued motion perception. Furthermore, our results suggest that MT is a likely  
316 neural substrate for the improvements in motion perception observed in patients with V1 damage.  
317 Therefore, one would predict that the sensitivity to random dot patterns of MT neurons would improve  
318 during perceptual training.

## Motion selectivity in MT after V1 lesions

### 319 **Materials and Methods**

#### 320 *Animals and surgical preparation*

321 Single and multi-unit extracellular recordings were obtained from 6 adult marmoset monkeys.  
322 Experiments were conducted in accordance with the Australian Code of Practice for the Care and Use of  
323 Animals for Scientific Purposes and all procedures were approved by the Monash University Animal  
324 Ethics Experimentation Committee. Four of the marmosets received V1 lesions (M1 to M4), and at time  
325 of lesion, they were aged > 2 years. Neural data from MT were collected from two additional adult  
326 marmosets (M5, M6) of comparable age at the time of the recordings, who did not receive V1 lesions.

#### 327 *Cortical lesions*

328 Intramuscular (i.m.) injections of atropine (0.2 mg/kg) and diazepam (2 mg/kg) were administered as  
329 premedication, 30 minutes prior to the induction of anesthesia with alfaxalone (Alfaxan, 10 mg/kg, Jurox,  
330 Rutherford, Australia). Dexamethasone (0.3 mg/kg i.m., David Bull, Melbourne Australia) and penicillin  
331 (Norocilin, 50 mg/kg, i.m.) were also administered. Body temperature, heart rate, and blood oxygenation  
332 (PO<sub>2</sub>) were continually monitored, and supplemental doses of anesthetic were administered when  
333 necessary to maintain areflexia. Under sterile conditions, a craniotomy was made over the occipital pole  
334 of the left hemisphere. Using a fine-tipped cautery, an excision was then made of all cortical tissue caudal  
335 to a plane extending from the dorsal surface of the occipital lobe to the cerebellar tentorium, across the  
336 entire mediolateral extent (Rosa et al., 2000). The caudal 6 – 8mm of cortex, approximately two-thirds of  
337 V1, was removed entirely, including the occipital operculum, the exposed medial and ventral surfaces,  
338 and the caudal part of the calcarine sulcus (Fig. 1A-C). After application of hemostatic microspheres, the  
339 exposed cortex and cerebellum were protected with ophthalmic film, and the cavity was filled with  
340 Gelfoam. The skull flap was repositioned and secured with cyanacrylate (Vetabond, 3M), and the skin  
341 was sutured. Throughout the post-lesion period, monkeys were housed in large cages in groups with  
342 access to both indoor and outdoor environments. Following the V1 lesion surgery, animals recovered for  
343 7-11 months before electrophysiological recordings.

#### 344 *Electrophysiological recordings*

345 The preparation for electrophysiological studies of marmosets has been described previously (Yu et al.,  
346 2010), and only the main points will be summarized here. Injections of atropine (0.2 mg/kg, i.m.) and  
347 diazepam (2 mg/kg, i.m.) were administered as premedication, 30 minutes prior to the induction of  
348 anesthesia with alfaxalone (Alfaxan, 10 mg/kg, i.m., Jurox, Rutherford, Australia), allowing a  
349 tracheotomy, vein cannulation and craniotomy to be performed. After all surgical procedures were

## Motion selectivity in MT after V1 lesions

350 completed, the animal received an intravenous infusion of pancuronium bromide (0.1 mg/kg/h; Organon,  
351 Sydney, Australia) combined with sufentanil (6 µg/kg/h; Janssen-Cilag, Sydney, Australia) and  
352 dexamethasone (0.4 mg/kg/h; David Bull, Melbourne, Australia), and was artificially ventilated with a  
353 gaseous mixture of nitrous oxide and oxygen (7:3). The electrocardiogram and level of cortical  
354 spontaneous activity were continuously monitored. Administration of atropine (1%) and phenylephrine  
355 hydrochloride (10%) eye drops (Sigma Pharmaceuticals, Melbourne, Australia) resulted in mydriasis and  
356 cycloplegia. Appropriate focus and protection of the corneas from desiccation were achieved by means of  
357 hard contact lenses selected by streak retinoscopy.

358 Neural recordings were made using single parylene-coated tungsten microelectrodes (0.7-1.2 MΩ) with  
359 exposed tips of 10 µm (Mircoprobe, MD). Electrophysiological data were recorded using a Cereplex  
360 system (Blackrock Microsystems, MD) with a sampling rate of 30 kHz. Each channel was high-pass  
361 filtered at 750 Hz. Spike waveforms were extracted off-line. Spike waveforms were then over-clustered  
362 using principal component analysis and manually merged on a moving 100 ms time window. Any  
363 remaining threshold crossings were classified as multi-unit activity.

### 364 *Stimuli*

365 Computer generated stimuli were presented on a Display ++ monitor (M1-M4; 1920 x 1080 pixels; 710 x  
366 395 mm; 120 Hz refresh rate, Cambridge Research Systems) or a VIEWPixx3D monitor (M5-M6; 1920 x  
367 1080 pixels; 520 x 295 mm; 120 Hz refresh rate, VPixx Technologies) positioned 0.35 to 0.45 m from the  
368 animal on an angle to accommodate the size and eccentricity of the receptive field(s). All stimuli were  
369 generated with MATLAB using Psychtoolbox-3 (Brainard, 1997; Pelli, 1997).

370 Stimuli for quantitative analysis consisted of random dots presented in circular apertures. Dots were white  
371 and displayed on a black background, and were 0.2 deg in diameter. The density was such that there were  
372 on average 0.5 dots per deg<sup>2</sup>. Dot coherence was controlled by randomly choosing a subset of “noise”  
373 dots on each frame which were displaced randomly within the stimulus aperture. The remaining “signal”  
374 dots were moved in the same direction with a fixed displacement.

### 375 *Determination of Scotoma*

376 The location of the scotoma was determined by mapping the receptive fields of neurons on the edge of the  
377 remaining parts of V1 (Fig 1D-G). This was done either on the Display++ monitor using static flashed  
378 squares (M1) or by hand mapping with luminance defined stimuli on a hemispheric screen (Yu and Rosa,  
379 2010). As reported elsewhere (Rosa et al., 2000; Yu et al., 2013), the locations of receptive fields of  
380 neurons located on both the dorsal and ventral banks of the calcarine sulcus were similar to those found at

## Motion selectivity in MT after V1 lesions

381 corresponding locations in normal animals (Fritsches and Rosa, 1996; Chaplin et al., 2013). The scotoma  
382 was defined as the area of the visual field in which V1 receptive fields could no longer be recorded (Fig.  
383 1D-G; dashed outlines).

### 384 *Determination of MT receptive fields*

385 In MT, receptive fields were quantitatively mapped using a grid of stimuli presented across the screen.  
386 These stimuli were either small apertures of briefly presented moving dots (300 ms, diameter 5 degrees,  
387 animals M1-M4) or static flashed squares (length 4 degrees, animals M5 and M6). For quantitative tests,  
388 stimuli were presented inside a circular aperture restricted to the excitatory receptive field.

### 389 *Quantitative Tests*

390 We conducted a series of tests to determine direction selectivity, speed tuning and sensitivity to motion  
391 coherence. All stimuli were presented for 500 ms with an inter-stimulus interval of 1000 ms. Direction  
392 and speed tuning tests used at least 12 repeats of each stimulus type, and motion coherence tests used 25  
393 repeats.

394 We tested for direction selectivity by presenting a circular aperture of random dots that moved in 1 of 8  
395 directions (0, 45, 90, 135, 180, 225, 270, 315) at 8 deg/s. Speed tuning was then tested using random dot  
396 stimuli with speeds (0, 2, 4, 8, 16, 32, 64, 128 deg/s) moving in the preferred and null direction. Stimuli  
397 with different motion coherences (0, 5, 10, 20, 50, 75, 100 %) were presented at a near-preferred speed, in  
398 both preferred and null directions.

### 399 *Data Analysis*

400 *Visual response:* Neurons were considered to be visually responsive if the mean stimulus-evoked activity  
401 across all conditions was significantly greater than the spontaneous rate (Wilcoxon rank sum test,  $p <$   
402 0.05).

403 *Direction selectivity:* The preferred direction was calculated using a vector sum of normalized above-  
404 spontaneous spiking rates (Ringach et al., 2002). In each task, neurons were classified as direction  
405 selective if the response in the preferred direction was significantly greater than the null direction  
406 (Wilcoxon rank sum test,  $p < 0.05$ ). To measure the degree of direction selectivity, we used three metrics.

407 First, we calculated a direction selectivity index (DSI):

$$408 \quad \text{DSI} = 1 - \frac{R_{\text{null}}}{R_{\text{pref}}} \quad (1)$$



## Motion selectivity in MT after V1 lesions

409 where  $R_{\text{pref}}$  and  $R_{\text{null}}$  are the above spontaneous spike rates in the preferred and null directions,  
410 respectively. Circular variance (CV) was calculated as 1 minus the length of the vector sum of normalized  
411 above-spontaneous spiking rates (Ringach et al., 2002). We also employed ideal observer analysis to  
412 determine the performance of MT neurons in discriminating two directions (Britten et al., 1992). This was  
413 calculated using the Receiver Operator Characteristic (aROC) curve for the distributions of responses to  
414 the preferred and null directions.

415 *z-Score firing rate differences:* We used random permutation to determine if the difference in mean  
416 between two conditions was significantly different than a distribution of mean differences from trials that  
417 were shuffled and chosen at random. We repeated this permutation 10,000 times to obtain a distribution.

418 *Direction thresholds:* In order to quantify a unit's susceptibility to motion noise, we employed ideal  
419 observer analysis to determine performance of MT neurons in a direction discrimination task (Britten et  
420 al., 1992). For each level of coherence, aROC was calculated and the aROC values were fitted using least  
421 squares regression with a Weibull function, resulting in a neurometric curve that described the neuron's  
422 performance with respect to coherence.

$$423 \quad p = 1 - 0.5 \exp[-(c/\alpha)^\beta] \quad (2)$$

424 where  $p$  was the probability of correctly discriminating the direction of motion at coherence  $c$ ,  $\alpha$  was the  
425 coherence of threshold performance ( $p=0.82$ ) and  $\beta$  controls slope. The  $\alpha$  was limited between 0 and 3,  
426 and the  $\beta$  was limited to be between 0 and 10. Neurons that do not have an aROC of at least 0.82 at 100%  
427 coherence cannot have a threshold (i.e.  $p(c=100) < 0.82$ ), and were excluded from analyses of thresholds,  
428 as was any neuron whose threshold exceeded 100%.

429 *Motion Thresholds:* In order to determine how well neurons could detect motion in the preferred direction  
430 versus random motion, we calculated aROC comparing the distribution of spikes evoked by each level of  
431 motion coherence with the distribution of spikes evoked by zero coherence. As for direction thresholds,  
432 we fit a Weibull function (equation (2) above) to these data to determine the detection threshold.

433 *Mean-matched Fano factor:* To compute the variance in firing rates over time, we computed the mean-  
434 matched Fano factor using the procedures described by Churchland and colleagues (Churchland et al.,  
435 2010) using the Variance toolbox (Stanford University) in MATLAB. Briefly, for each single unit we  
436 used the firing rates from the motion coherence task. Each stimulus condition (motion coherence and  
437 direction) was treated separately. Spike counts were computed using a 100 ms sliding window moving in  
438 50 ms time steps. To control for differences in firing rates, we computed a mean-matched Fano factor. For

## Motion selectivity in MT after V1 lesions

439 each time window, we matched the mean firing rates by randomly deleting spikes until mean rates were  
440 matched across time. The Fano factor was then computed from the residual spikes.

441 *Network model:* We implemented a network model of our data in Python using the Brian simulator  
442 version 2. The network model was a biophysical network model of a randomly connected excitatory  
443 inhibitory (E-I) network with 1600 excitatory (E) and 400 inhibitory (I) leaky integrate-and-fire neurons.  
444 We used the Euler integration method with a time step of 0.1 ms. The network model was based on the  
445 model of an MT-like sensory circuit published by Wimmer and colleagues (Wimmer et al., 2015). All  
446 model equations and parameter values used were replicated from Wimmer (2015). Synaptic transmission  
447 mimicked AMPA and GABA<sub>A</sub> receptor conductance dynamics. Excitatory neurons were divided into two  
448 populations, E1 and E2, each preferring opposite directions of motion. Connections within each  
449 population were stronger ( $w_{pref} = 1.3$ ) compared to connections across populations ( $w_{null} = 0.7$ ),  
450 mimicking the stronger coupling among cells with similar tuning. The two populations were then further  
451 divided into two equal sub-populations (E1i, E2i, E1o, E2o) that represented cells inside and outside the  
452 LPZ. We implemented two types of manipulations: the type of input into MT neurons (direction selective,  
453 non-direction selective, or no visual input) and changes in the balance of excitation and inhibition within  
454 MT.

455 The input into MT was modeled as a time-varying input current into each neuron:

$$456 \quad I_{stim,k}(t) = V_i(1 + cD_i + s(t)) \quad (3)$$

457 where  $I_{stim}$  is the amount of current (nA) injected into each neuron ( $k$ ) at over time ( $t$ ).  $V_i$  is the amount of  
458 visual input for a stimulus with no motion coherence (0.04 nA).  $D_i$  is the amount of additional direction  
459 selective input to a neuron when the stimulus is moving in the preferred direction and is modulated by the  
460 motion coherence ( $c$ ) of the stimulus. Time varying modulations in sensory input by the specific  
461 realization of the random dot stimulus are captured by  $s(t)$  where:

$$462 \quad s(t) = \sigma_s z^\beta(t) + \sigma_s z_k^\beta(t) \quad (4)$$

463 where  $z^\beta(t)$  and  $z_k^\beta(t)$  are independent Ornstein-Uhlenbeck processes with zero mean, s.d. equal to one,  
464 and a time constant of 20 ms. The term  $z^\beta(t)$  represents the ‘common’ part of the stimulus that is  
465 consistent across each neural population  $\beta$  and  $z_k^\beta(t)$  represents the “private” part of the stimulus that is  
466 unique to each neuron in each population. The amplitude of the temporal modulation of the stimulus is set  
467 by  $\sigma_s$  (0.212). This allowed us to modulate the parameters of the stimulus into the populations of neurons  
468 “inside” and “outside” the LPZ to mimic different types of inputs into the LPZ in the absence of V1 input.

## Motion selectivity in MT after V1 lesions

469 We also modified the E-I balance of the network by manipulating the probability of synaptic connections  
470 between neurons. Under balanced conditions, all neural connections (EE, EI, II) were connected with  
471 equal probability ( $p = 0.2$ ). Under imbalanced conditions, the probability of connection between  
472 excitatory neuron outside the LPZ and inside the LPZ was increased ( $p = 0.3$ ) and the probability of  
473 connection with inhibitory neurons inside the LPZ was decreased ( $p = 0.1$ ). Finally, we reduced the  
474 weighting of synaptic inputs between excitatory neurons inside and outside the LPZ ( $w = 1.1$ ). As in the  
475 experimental conditions, the “stimulus” lasted for 500 ms with a 1000 ms interval between repetitions.  
476 We tested network responses to coherences (0, 0.25, 5, 0.75, 1) in the preferred and null directions of each  
477 population.

### 478 *Histology*

479 At the end of the recordings, the animals were given an intravenous lethal dose of sodium pentobarbitone  
480 and, following cardiac arrest, were perfused with 0.9% saline, followed by 4% paraformaldehyde in 0.1M  
481 phosphate buffer pH7.4. The brain was postfixed for approximately 24 hours in the same solution, and  
482 then cryo-protected with fixative solutions containing 10%, 20%, and 30% sucrose. The brains were then  
483 frozen and sectioned into 40  $\mu\text{m}$  coronal slices. Alternate series were stained for Nissl substance and  
484 myelin (Gallyas, 1979). The location of recording sites was reconstructed by identifying electrode tracks,  
485 depth readings recorded during the experiment, and by electrolytic lesions performed at the end of  
486 penetrations. Area MT was defined by heavy myelination (Rosa and Elston, 1998). Recording sites were  
487 projected onto layer 4 lateral view reconstructions of MT (Fig. 2). All neurons reported here were  
488 histologically confirmed to be in MT including those in the two control animals.

489 *Estimation of LPZ:* To assess the changes in responses of in MT of V1-damaged animals compared with  
490 control animals, it was necessary to estimate the portion of MT that originally represented the same part  
491 of the visual field as the portion of V1 affected by the lesion. This portion of MT is referred to as the LPZ,  
492 as neurons inside the lesion projection zone no longer receive normal retinotopic inputs from V1 after the  
493 lesion. To establish the LPZ, isoeccentricity and polar lines were projected onto the lateral view  
494 reconstructions of MT in each individual case based on the average visuotopic map of this area (Fig 1D-  
495 G; (Rosa and Elston, 1998)). This average map was based on reconstructions of MT in six normal cases,  
496 which were superimposed after having been aligned and scaled to equal area. The visuotopy of MT has  
497 been demonstrated to be highly consistent across individuals (Rosa and Elston, 1998). The estimates of  
498 the pre-lesion visuotopic maps thus obtained were then fine-tuned for each case based on the size and  
499 extent of MT measured in each case (see above). Based on the visuotopic coordinates, the scotoma for

## Motion selectivity in MT after V1 lesions

500 each individual animal was then projected onto the lateral view reconstruction of MT (Fig 1D-G), thus  
501 defining a lesion projection zone for each individual case.

Motion selectivity in MT after V1 lesions

502 **References**

- 503 Ajina S, Pestilli F, Rokem A, Kennard C, Bridge H (2015) Human blindsight is mediated by an intact  
504 geniculo-extrastriate pathway Brown EN, ed. *Elife* 4:1–23. <http://doi.org/10.7554/eLife.08935.001>  
505
- 506 Alexander I, Cowey A (2008) The cortical basis of global motion detection in blindsight. *Exp Brain Res*  
507 192:407–411. <http://doi.org/10.1007/s00221-008-1508-4>  
508
- 509 Atapour N, Worthy KH, Lui LL, Yu H-H, Rosa MGP (2017) Neuronal degeneration in the dorsal lateral  
510 geniculate nucleus following lesions of primary visual cortex: comparison of young adult and  
511 geriatric marmoset monkeys. *Brain Struct Funct* 222:3283–3293. <http://doi.org/10.1007/s00429-017-1404-4>  
512  
513
- 514 Azzopardi P, Cowey A (2001) Motion discrimination in cortically blind patients. *Brain* 124:30–46.
- 515 Azzopardi P, Fallah M, Gross CG, Rodman HR (2003) Response latencies of neurons in visual areas MT  
516 and MST of monkeys with striate cortex lesions. *Neuropsychologia* 41:1738–1756.  
517 [http://doi.org/10.1016/S0028-3932\(03\)00176-3](http://doi.org/10.1016/S0028-3932(03)00176-3)  
518
- 519 Barbur JL, Watson J, Frackowiak R, Zeki S (1993) Conscious visual perception without VI. *Brain*  
520 116:1293–1302.
- 521 Barnes SJ, Franzoni E, Jacobsen RI, Erdelyi F, Szabo G, Clopath C, Keller GB, Keck T (2017)  
522 Deprivation-induced homeostatic spine scaling *in vivo* is localized to dendritic branches that have  
523 undergone recent spine loss. *Neuron* 96:871–882. <http://doi.org/10.1016/j.neuron.2017.09.052>  
524
- 525 Berman RA, Wurtz RH (2010) Functional identification of a pulvinar path from superior colliculus to  
526 cortical area MT. *J Neurosci* 30:6342–6354. <http://doi.org/10.1523/JNEUROSCI.6176-09.2010>  
527
- 528 Berman RA, Wurtz RH (2011) Signals conveyed in the pulvinar pathway from superior colliculus to  
529 cortical area MT. *J Neurosci* 31:373–384. <http://doi.org/10.1523/JNEUROSCI.4738-10.2011>  
530
- 531 Brainard DH (1997) The Psychophysics Toolbox. *Spat Vis* 10:433–436.
- 532 Bridge H, Hicks SL, Xie J, Okell TW, Mannan S, Alexander I, Cowey A, Kennard C (2010) Visual  
533 activation of extra-striate cortex in the absence of V1 activation. *Neuropsychologia* 48:4148–4154.  
534 <http://doi.org/10.1016/j.neuropsychologia.2010.10.022>  
535
- 536 Bridge H, Thomas O, Jbabdi S, Cowey A (2008) Changes in connectivity after visual cortical brain  
537 damage underlie altered visual function. *Brain* 131:1433–1444. <http://doi.org/10.1093/brain/awn063>  
538
- 539 Britten KH, Shadlen MN, Newsome WT, Movshon JA (1992) The analysis of visual motion: a  
540 comparison of neuronal and psychophysical performance. *J Neurosci* 12:4745–4765.
- 541 Cavanaugh MR, Huxlin KR (2017) Visual discrimination training improves Humphrey perimetry in  
542 chronic cortically induced blindness. *Neurology* 88:1856–1864.  
543 <http://doi.org/10.1212/WNL.0000000000003921>  
544
- 545 Cavanaugh MR, Zhang R, Melnick MD, Das A, Roberts M, Tadin D, Carrasco M, Huxlin KR (2015)  
546 Visual recovery in cortical blindness is limited by high internal noise. *J Vis* 15:9.  
547 <http://doi.org/10.1167/15.10.9>

## Motion selectivity in MT after V1 lesions

- 548  
549 Celeghin A, Diano M, de Gelder B, Weiskrantz L, Marzi CA, Tamietto M (2017) Intact hemisphere and  
550 corpus callosum compensate for visuomotor functions after early visual cortex damage. *Proc Natl*  
551 *Acad Sci USA*. <http://doi.org/10.1073/pnas.1714801114>  
552
- 553 Chaplin TA, Allitt BJ, Hagan MA, Price NSC, Rajan R, Rosa MGP, Lui LL (2017) Sensitivity of neurons  
554 in the middle temporal area of marmoset monkeys to random dot motion. *J Neurophysiol* 118:1567–  
555 1580. <http://doi.org/10.1152/jn.00065.2017>  
556
- 557 Chaplin TA, Yu HH, Soares JGM, Gattass R, Rosa MGP (2013) A conserved pattern of differential  
558 expansion of cortical areas in simian primates. *J Neurosci* 33:15120–15125.  
559 <http://doi.org/10.1523/JNEUROSCI.2909-13.2013>  
560
- 561 Cheong SK, Tailby C, Solomon SG, Martin PR (2013) Cortical-like receptive fields in the lateral  
562 geniculate nucleus of marmoset monkeys. *J Neurosci* 33:6864–6876.  
563 <http://doi.org/10.1523/JNEUROSCI.5208-12.2013>
- 564 Churchland MM et al. (2010) Stimulus onset quenches neural variability: a widespread cortical  
565 phenomenon. *Nat Neurosci* 13:369–378. <http://doi.org/10.1038/nn.2501>  
566
- 567 Collins CE, Lyon DC, Kaas JH (2003) Responses of neurons in the middle temporal visual area after  
568 long-standing lesions of the primary visual cortex in adult new world monkeys. *J Neurosci* 23:2251–  
569 2264.
- 570 Darian-Smith C, Gilbert CD (1994) Axonal sprouting accompanies functional reorganization in adult cat  
571 striate cortex. *Nature* 368:737–740.
- 572 Das A, Tadin D, Huxlin KR (2014) Beyond blindsight: properties of visual relearning in cortically blind  
573 fields. *J Neurosci* 34:11652–11664. <http://doi.org/10.1523/JNEUROSCI.1076-14.2014>  
574
- 575 Eysel UT, Schweigart G (1999) Increased receptive field size in the surround of chronic lesions in the  
576 adult cat visual cortex. *Cereb Cortex* 9:101–109.
- 577 Eysel UT, Schweigart G, Mittmann T, Eyding D, Qu Y, Vandesande F, Orban G, Arckens L (1999)  
578 Reorganization in the visual cortex after retinal and cortical damage. *Restor Neurol Neurosci* 15:153–  
579 164.
- 580 Fritsches KA, Rosa MGP (1996) Visuotopic organisation of striate cortex in the marmoset monkey  
581 (*Callithrix jacchus*). *J Comp Neurol* 372:264–282.
- 582 Gallyas F (1979) Silver staining of myelin by means of physical development. *Neurol Res* 1:203–209.
- 583 Giannikopoulos DV, Eysel UT (2006) Dynamics and specificity of cortical map reorganization after  
584 retinal lesions. *Proc Natl Acad Sci USA* 103:10805–10810. <http://doi.org/10.1073/pnas.0604539103>  
585
- 586 Girard P, Salin PA, Bullier J (1992) Response selectivity of neurons in area MT of the macaque monkey  
587 during reversible inactivation of area V1. *J Neurophysiol* 67:1437–1446.
- 588 Horton JC, Hoyt WF (1991) The representation of the visual field in human striate cortex. A revision of  
589 the classic Holmes map. *Arch Ophthalmol* 109:816–824.

## Motion selectivity in MT after V1 lesions

- 590 Huxlin KR, Martin T, Kelly K, Riley M, Friedman DI, Burgin WS, Hayhoe M (2009) Perceptual  
591 relearning of complex visual motion after V1 damage in humans. *J Neurosci* 29:3981–3991.  
592 <http://doi.org/10.1523/JNEUROSCI.4882-08.2009>  
593
- 594 Keck T, Scheuss V, Jacobsen RI, Wierenga CJ, Eysel UT, Bonhoeffer T, Hübener M (2011) Loss of  
595 sensory input causes rapid structural changes of inhibitory neurons in adult mouse visual cortex.  
596 *Neuron* 71:869–882. <http://doi.org/10.1016/j.neuron.2011.06.034>  
597
- 598 Klüver H (1936) An analysis of the effects of the removal of the occipital lobes in monkeys. *J Psychol:*  
599 *Interdiscip Appl* 2:49–61. <http://doi.org/10.1080/00223980.1941.9917017>  
600
- 601 Klüver H (1941) Visual functions after removal of the occipital lobes. *J Psychol: Interdiscip Appl* 11:23–  
602 45.
- 603 Lister WT, Holmes G (1916) Disturbances of vision from cerebral lesions, with special reference to the  
604 cortical representation of the macula. *Proc R Soc Med* 9:57–96.
- 605 Litwin-Kumar A, Doiron B (2012) Slow dynamics and high variability in balanced cortical networks with  
606 clustered connections. *Nat Neurosci* 15:1498–1505. <http://doi.org/10.1038/nn.3220>  
607
- 608 Movshon JA, Newsome WT (1996) Visual response properties of striate cortical neurons projecting to  
609 area MT in macaque monkeys. *J Neurosci* 16:7733–7741.
- 610 Palagina G, Eysel UT, Jancke D (2009) Strengthening of lateral activation in adult rat visual cortex after  
611 retinal lesions captured with voltage-sensitive dye imaging in vivo. *Proc Natl Acad Sci USA*  
612 106:8743–8747. <http://doi.org/10.1073/pnas.0900068106>  
613
- 614 Pelli DG (1997) The VideoToolbox software for visual psychophysics: transforming numbers into  
615 movies. *Spat Vis* 10:437–442.
- 616 Poppel E, Held R, Frost D (1973) Residual visual function after brain wounds involving the central visual  
617 pathways in man. *Nature* 243:295–296.
- 618 Raninen A, Vanni S, Hyvarinen L, Nasanen R (2007) Temporal sensitivity in a hemianopic visual field  
619 can be improved by long-term training using flicker stimulation. *J Neurol Neurosurg Psychiatry*  
620 78:66–73. <http://doi.org/10.1136/jnnp.2006.099366>  
621
- 622 Riddoch G (1917) Dissociation of visual perceptions due to occipital injuries, with especial reference to  
623 appreciation of movement. *Brain* 40:15–57.
- 624 Ringach DL, Shapley RM, Hawken MJ (2002) Orientation selectivity in macaque V1: diversity and  
625 laminar dependence. *J Neurosci* 22:5639–5651.
- 626 Rodman HR, Gross CG, Albright TD (1989) Afferent basis of visual response properties in area MT of  
627 the macaque. I. Effects of striate cortex removal. *J Neurosci* 9:2033–2050.
- 628 Rodman HR, Gross CG, Albright TD (1990) Afferent basis of visual response properties in area MT of  
629 the macaque. II. Effects of superior colliculus removal. *J Neurosci* 10:1154–1164.
- 630 Rosa MGP, Elston GN (1998) Visuotopic organisation and neuronal response selectivity for direction of  
631 motion in visual areas of the caudal temporal lobe of the marmoset monkey (*Callithrix jacchus*):

## Motion selectivity in MT after V1 lesions

- 632 middle temporal area, middle temporal crescent, and surrounding cortex. *J Comp Neurol* 393:505–  
633 527.
- 634 Rosa MGP, Tweedale R, Elston GN (2000) Visual responses of neurons in the middle temporal area of  
635 new world monkeys after lesions of striate cortex. *J Neurosci* 20:5552–5563.
- 636 Sahraie A, Hibbard PB, Trevethan CT, Ritchie KL, Weiskrantz L (2010) Consciousness of the first order  
637 in blindsight. *Proc Natl Acad Sci USA* 107:21217–21222. <http://doi.org/10.1073/pnas.1015652107>  
638
- 639 Sahraie A, Trevethan CT, MacLeod MJ, Murray AD, Olson JA, Weiskrantz L (2006) Increased  
640 sensitivity after repeated stimulation of residual spatial channels in blindsight. *Proc Natl Acad Sci*  
641 *USA* 103:14971–14976. <http://doi.org/10.1073/pnas.0607073103>  
642
- 643 Sanders MD, Warrington EK, Marshall J, Weiskrantz L (1974) “Blindsight”: Vision in a field defect.  
644 *Lancet* 1:707–708.
- 645 Schmid LM, Rosa MGP, Calford MB, Ambler JS (1996) Visuotopic reorganization in the primary visual  
646 cortex of adult cats following monocular and binocular retinal lesions. *Cereb Cortex* 6:388–405.
- 647 Schmid MC, Mrowka SW, Turchi J, Saunders RC, Wilke M, Peters AJ, Ye FQ, Leopold DA (2011)  
648 Blindsight depends on the lateral geniculate nucleus. *Nature* 466:373–377.
- 649 Sincich LC, Park KF, Wohlgemuth MJ, Horton JC (2004) Bypassing V1: a direct geniculate input to area  
650 MT. *Nat Neurosci* 7:1123–1128. <http://doi.org/10.1038/nn1318>  
651
- 652 Solomon SG, Tailby C, Cheong SK, Camp AJ (2010) Linear and nonlinear contributions to the visual  
653 sensitivity of neurons in primate lateral geniculate nucleus. *J Neurophysiol* 104:1884–1898.  
654 <http://doi.org/10.1152/jn.01118.2009>  
655
- 656 Warner CE, Goldshmit Y, Bourne JA (2010) Retinal afferents synapse with relay cells targeting the  
657 middle temporal area in the pulvinar and lateral geniculate nuclei. *Front Neuroanat* 4:8.  
658 <http://doi.org/10.3389/neuro.05.008.2010>  
659
- 660 Warner CE, Kwan WC, Bourne JA (2012) The early maturation of visual cortical area MT is dependent  
661 on input from the retinorecipient medial portion of the inferior pulvinar. *J Neurosci* 32:17073–17085.  
662 <http://doi.org/10.1523/JNEUROSCI.3269-12.2012>  
663
- 664 Warner CE, Kwan WC, Wright D, Johnston LA, Egan GF, Bourne JA (2015) Preservation of vision by  
665 the pulvinar following early-life primary visual cortex lesions. *Curr Biol* 25:424–434.  
666 <http://doi.org/10.1016/j.cub.2014.12.028>  
667
- 668 Weiskrantz L (1996) Blindsight revisited. *Curr Opin Neurobiol* 6:215–220.
- 669 Weiskrantz L, Warrington EK, Sanders MD, Marshall J (1974) Visual capacity in the hemianopic field  
670 following a restricted occipital ablation. *Brain* 97:709–728. <http://doi.org/10.1093/brain/97.1.709>  
671
- 672 White AJ, Solomon SG, Martin PR (2001) Spatial properties of koniocellular cells in the lateral  
673 geniculate nucleus of the marmoset *Callithrix jacchus*. *J Physiol* 533:519–535.
- 674 Wimmer K, Compte A, Roxin A, Peixoto D, Renart A, la Rocha de J (2015) Sensory integration  
675 dynamics in a hierarchical network explains choice probabilities in cortical area MT. *Nat Commun*



## Motion selectivity in MT after V1 lesions

- 676 6:6177. <http://doi.org/10.1038/ncomms7177>  
677  
678 Yamahachi H, Marik SA, McManus JNJ, Denk W, Gilbert CD (2009) Rapid axonal sprouting and  
679 pruning accompany functional reorganization in primary visual cortex. *Neuron* 64:719–729.  
680 <http://doi.org/10.1016/j.neuron.2009.11.026>  
681  
682 Yu H-H, Rosa MGP (2010) A simple method for creating wide-field visual stimulus for  
683 electrophysiology: mapping and analyzing receptive fields using a hemispheric display. *J Vis* 10:15–  
684 15. <http://doi.org/10.1167/10.14.15>  
685  
686 Yu H-H, Verma R, Yang Y, Tibballs HA, Lui LL, Reser DH, Rosa MGP (2010) Spatial and temporal  
687 frequency tuning in striate cortex: functional uniformity and specializations related to receptive field  
688 eccentricity. *Eur J Neurosci* 31:1043–1062. <http://doi.org/10.1167/10.14.15>  
689  
690 Yu HH, Chaplin TA, Egan GW, Reser DH, Worthy KH, Rosa MGP (2013) Visually Evoked Responses  
691 in Extrastriate Area MT After Lesions of Striate Cortex in Early Life. *J Neurosci* 33:12479–12489.  
692 <http://doi.org/10.1111/j.1460-9568.2010.07118.x>  
693  
694 Zhang X, Kedar S, Lynn MJ, Newman NJ, Biousse V (2006) Natural history of homonymous  
695 hemianopia. *Neurology* 66:901–905. <http://doi.org/10.1212/01.wnl.0000203338.54323.22>  
696  
697
